# Supplementary material for: Identification of novel transcripts with differential dorso-ventral expression in Xenopus gastrula using serial analysis of gene expression
Source: PubMed Central journal article supplement (PMC2688288; doi:10.1186/gb-2009-10-2-r15), 2009-02-11
Supplement: gb-2009-10-2-r15-S1.pdf [file gb-2009-10-2-r15-S1.pdf]

## Faunes et al, Supplementary table 1

| Gen                     | Tag (15 <sup>th</sup> base)            | Transcript*                              | Dorsal frequency | Ventral frequency | Normalized ratio (p-val eSAGE)     |
|-------------------------|----------------------------------------|------------------------------------------|------------------|-------------------|------------------------------------|
| <i>admp</i>             | CATGTA CTGCGTTA(T)                     | NM_001045692.1<br>ENSXETT00000019176     | 8                | 0                 | 8.2<br>(0.0035)                    |
| <i>cerberus</i>         | CATGGATGCATCTA(C)                      | NM_203515.1                              | 3                | 0                 | 3.1<br>(0.1215)                    |
| <i>chordin*</i>         | CATGATGTTACTTT(G)<br>CATGGTTCACGATG(G) | Xt6.1-TNeu120o03.3**                     | 3<br>2           | 0<br>0            | 3.1<br>(0,1215)<br>2.1<br>(0,2465) |
| <i>dkk-1</i>            | CATGATCCTCTCTA(T)                      | Xt6.1-TGas131c10.3<br>ENSXETT00000014461 | 1                | 0                 | 1<br>(0,4999)                      |
| <i>pintallavis</i>      | CATGAAACCTGTTT(T)                      | NM_203607.1<br>ENSXETT00000055323        | 34 (32)          | 2                 | 17.5<br>(6,65e-9)                  |
| <i>crescent (frzb2)</i> | CATGCGTGGGACCC(G)                      | NM_001016688.1                           | 2                | 0                 | 2.1<br>(0,2465)                    |
| <i>goosecoid</i>        | CATGATGTGGGATC(T)                      | NM_001016704.2<br>ENSXETT00000050392     | 11               | 0                 | 11.3<br>(0,0004)                   |
| <i>noggin 1</i>         | CATGTTATATGCAC(T)                      | AY672091.1                               | 2                | 0                 | 2.1<br>(0,2465)                    |
| <i>otx2</i>             | CATGGCTGCCTTCT(G)                      | NM_001016177.2<br>ENSXETT00000034219     | 5                | 0                 | 5.1<br>(0,02955)                   |
| <i>siamois</i>          | CATGAAGTTTGAAG(A)                      | NM_001097352.1                           | 0                | 0                 | -                                  |
| <i>sox3</i>             | CATGAAAGTAAAAC(G)                      | NM_001007501.1                           | 20 (18)          | 8                 | 2.6<br>(0,0204)                    |
| <i>xnot</i>             | CATGATTGTATTAT(T)                      | CT025280.2<br>ENSXETT00000025770         | 3                | 0                 | 3.1<br>(0,1215)                    |
| <i>zic3</i>             | CATGCAACACTGAA(A)                      | NM_001005691.1<br>ENSXETT00000052875     | 5 (4)            | 0                 | 5.1<br>(0,0295)                    |
| <i>frzb</i>             | CATGGACTTTAATA(C)                      | NM_001005438.1<br>ENSXETT00000002846     | 1                | 0                 | 1<br>(0,4999)                      |
| <i>sfrp2</i>            | CATGTTGTGCCGGT(A)                      | NM_203731.1<br>ENSXETT00000055200        | 1                | 0                 | 1<br>(0,4999)                      |
| <i>follistatin</i>      | CATGTAAATGTGTA(A)                      | NM_001008056.1                           | 1                | 0                 | 1<br>(0,4999)                      |
| <i>bambi</i>            | CATGGTGCCAGTGA(C)                      | NM_001008193.1<br>ENSXETT00000009856     | 0                | 6                 | -5.8<br>(0,0171)                   |
| <i>bmp4</i>             | CATGGAGACTCTGA(A)                      | AJ315161.1                               | 0                | 2                 | -1.9<br>(0,2604)                   |
| <i>bmp7</i>             | CATGATATTTTATC(C)                      | NM_001033938.2<br>ENSXETT00000035775     | 2 (1)            | 5                 | -2.5<br>(0,3075)                   |
| <i>crossveinless-2</i>  | CATGTGAAAACCTGG(A)                     | NM_001044402.1                           | 0                | 1                 | 1<br>(0,5138)                      |
| <i>sizzled</i>          | CATGCTGTATAAGA(A)                      | NM_001044506.1<br>ENSXETT00000048172     | 0                | 1                 | 1<br>(0,5138)                      |
| <i>twisted</i>          | CATGCTTACACTAA(T)                      | NM_001006747.1                           | 0                | 0                 | -                                  |
| <i>wnt8</i>             | CATGTTTGGTTTGT(T)                      | NM_001017208.2<br>ENSXETT00000008323     | 0                | 1                 | 1<br>(0,5138)                      |
| <i>vent1.1</i>          | CATGGGAGCTATGG(C)                      | NM_001114235.1                           | 0                | 15                | -14.6<br>(3,8e-5)                  |
| <i>vent1.2</i>          | CATGTAACCCCTGG(A)                      | NM_203530.1<br>ENSXETT00000019491        | 0                | 8                 | -7.8<br>(0,0044)                   |
| <i>vent2</i>            | CATGATTTTATTCA(C)                      | AY187016.1<br>ENSXETT00000056265         | 8                | 12                | -1.5<br>(0,4190)                   |
| <i>xbra</i>             | CATGTGATGTTTTT(G)                      | NM_001008138.1<br>ENSXETT00000011786     | 7                | 3                 | 2.4<br>(0,2151)                    |
| <i>odc1</i>             | CATGGCATTCTCCC(T)                      | NM_001005441.1<br>ENSXETT00000007603     | 31               | 25                | 1.3<br>(0,3790)                    |
| <i>ef1alpha</i>         | CATGAGGCAGACGG(T)                      | NM_203970.2                              | 133 (130)        | 144 (137)         | -1.1<br>(-)                        |

### **Supplementary Table 1. Tags derived from control genes.**

Known genes with differential expression along the dorso-ventral axis were analyzed and the most 3' tag was extracted. These tags were searched in the list of experimental tags and frequencies in each library are indicated. The 15<sup>th</sup> base of the tag is indicated between parentheses. If the frequency of occurrence of the 15-nts tag is different from the frequency of the 14-nts tag, this is indicated between parentheses.

\* Sequences used to extract virtual tags are indicated. Virtual tags derived from mRNA sequences (“NM”) or Ensembl cDNAs (“ENSXETT”) are first considered. If mRNA sequence or Ensembl cDNA is not available, Unigenes and EST clusters are used.

\*\* Virtual tag for *chordin* was obtained by comparison of sequences of *X. tropicalis* and *X. laevis* to determine the 3' end. In addition, tag derived from upstream an internal polyA tract position was considered.

## Faunes et al, Supplementary table 2

| DV_ID | Tag sequence    | Dorsal frequency | Ventral frequency | Normalized ratio* | Matches to Genome | Tag-mapping                                                                                                                                     |
|-------|-----------------|------------------|-------------------|-------------------|-------------------|-------------------------------------------------------------------------------------------------------------------------------------------------|
| DV01  | CATGAAACCTGTTT  | 34               | 2                 | 17.5              | 23                | <i>Pintallavis (forkhead box4)</i>                                                                                                              |
| DV02  | CATGAGTTTCTTGT  | 20               | 1                 | 20.6              | 14                | <i>Xt6.1-CAAM15738.5SS, Xt6.1-CAAM9567.5S, Xt6.1-CAAM4052.5</i>                                                                                 |
| DV03  | CATGGGAGCTATGG  | 0                | 15                | -14.6             | 10                | <i>Vent-1.1</i>                                                                                                                                 |
| DV04  | CATGCATTAATGAA  | 18               | 2                 | 9.3               | 26                | Not assigned                                                                                                                                    |
| DV05  | CATGAGCTGTATGC  | 20               | 3                 | 6.9               | 1482              | <i>Doublecortin domain containing 2B, Str#S23608264, family with sequence similarity 119, DCN1-like protein 2, Str#S22844133, Str#S38479083</i> |
| DV06  | CATGATGTGGGATC  | 11               | 0                 | 11.3              | 2                 | <i>goosecoid</i>                                                                                                                                |
| DV07  | CATGTGGCGTCCG   | 9                | 0                 | 9.3               | 1                 | <i>Zcsl-2</i>                                                                                                                                   |
| DV08  | CATGAAAATAAAAC  | 9                | 0                 | 9.3               | 82                | <i>Ubadc1/ LOC496648</i>                                                                                                                        |
| DV09  | CATGCAAGTATGTT  | 11               | 1                 | 11.3              | 20                | <i>Sox11</i>                                                                                                                                    |
| DV10  | CATGTACTGCGTTA  | 8                | 0                 | 8.2               | 7                 | <i>admp</i>                                                                                                                                     |
| DV11  | CATGATGGCGGAGC  | 8                | 0                 | 8.2               | 3                 | <i>LOC100124861</i>                                                                                                                             |
| DV12  | CATGCTCTACCCT   | 13               | 2                 | 6.7               | 9                 | <i>LOC549498</i>                                                                                                                                |
| DV13  | CATGCTAGACTTTT  | 1                | 11                | -10.7             | 12                | <i>Id-2</i>                                                                                                                                     |
| DV14  | CATGTGGGAACAGA  | 0                | 8                 | -7.8              | 10                | Not assigned                                                                                                                                    |
| DV15  | CATGTAACCCCTGG  | 0                | 8                 | -7.8              | 11                | <i>Vent-1.2</i>                                                                                                                                 |
| DV16  | CATGCGCTGTACA   | 10               | 1                 | 10.3              | 3                 | <i>MGC147163</i>                                                                                                                                |
| DV17  | CATGATTGGTGCC   | 12               | 2                 | 6.2               | 11                | <i>Str.45862/Str.40022</i>                                                                                                                      |
| DV18  | CATGAAAATTAAAT  | 12               | 2                 | 6.2               | 68                | <i>LOC548724</i>                                                                                                                                |
| DV19  | CATGTTCACTGTTT  | 7                | 0                 | 7.2               | 26                | Not assigned                                                                                                                                    |
| DV20  | CATGTCTACTGCAG  | 7                | 0                 | 7.2               | 20                | <i>LOC394509</i>                                                                                                                                |
| DV21  | CATGTCCTTATTAA  | 7                | 0                 | 7.2               | 26                | Not assigned                                                                                                                                    |
| DV22  | CATGGTTGGCTGGA  | 1                | 10                | -9.7              | 9                 | <i>smagp</i>                                                                                                                                    |
| DV23  | CATGTTCCAGGTG   | 2                | 12                | -5.8              | 19                | <i>Xt6.1-CAAL21480.5S, Xt6.1-XZG37850.5S</i>                                                                                                    |
| DV24  | CATGGCAGCTCCAT  | 2                | 12                | -5.8              | 44                | <i>e2f5</i>                                                                                                                                     |
| DV25  | CATGATGTACAGTT  | 2                | 12                | -5.8              | 27                | <i>cyclin A2</i>                                                                                                                                |
| DV26  | CATGTTTTAGTTTG  | 0                | 7                 | -6.8              | 45                | <i>LOC549800</i>                                                                                                                                |
| DV27  | CATGTGATACTAAG  | 0                | 7                 | -6.8              | 7                 | <i>MGC76280</i>                                                                                                                                 |
| DV28  | CATGTAGCTTATAC  | 0                | 7                 | -6.8              | 12                | <i>hsbp1</i>                                                                                                                                    |
| DV29  | CATGTA AAACTGAA | 0                | 7                 | -6.8              | 47                | <i>LOC100038289</i>                                                                                                                             |
| DV30  | CATGGTTAGGAGGT  | 0                | 7                 | -6.8              | 7                 | Not assigned                                                                                                                                    |
| DV31  | CATGGGGTGGGAGG  | 0                | 7                 | -6.8              | 42                | <i>MGC75957</i>                                                                                                                                 |
| DV32  | CATGCCAATTCGC   | 0                | 7                 | -6.8              | 2                 | Not assigned                                                                                                                                    |
| DV33  | CATGGAGATTAGCG  | 9                | 1                 | 9.3               | 4                 | <i>tumor protein p53</i>                                                                                                                        |
| DV34  | CATGCCGCTCAGAC  | 9                | 1                 | 9.3               | 3                 | <i>sympleskin</i>                                                                                                                               |
| DV35  | CATGATGGGATTCT  | 11               | 2                 | 5.7               | 12                | <i>LOC100145022</i>                                                                                                                             |
| DV36  | CATGACGAGTAGCG  | 11               | 2                 | 5.7               | 0                 | No match to genome                                                                                                                              |

|      |                 |    |    |      |    |                                                                                                                                               |
|------|-----------------|----|----|------|----|-----------------------------------------------------------------------------------------------------------------------------------------------|
| DV37 | CATGTGTGAGAGCA  | 1  | 9  | -8.8 | 17 | LOC550036, LOC549521                                                                                                                          |
| DV38 | CATGTAGATATTAG  | 1  | 9  | -8.8 | 25 | <i>nap111</i>                                                                                                                                 |
| DV39 | CATGGGCAATGGGA  | 1  | 9  | -8.8 | 16 | <i>mix1</i>                                                                                                                                   |
| DV40 | CATGGAATTGAATA  | 1  | 9  | -8.8 | 60 | <i>xtr-mir-427-3</i>                                                                                                                          |
| DV41 | CATGATTACCTTTT  | 1  | 9  | -8.8 | 29 | LOC100158535                                                                                                                                  |
| DV42 | CATGTGTTTTTATA  | 6  | 0  | 6.2  | 93 | SMAD 9,<br>splicing factor,<br>arginine/serine-rich 10                                                                                        |
| DV43 | CATGTGGCCAGCGT  | 6  | 0  | 6.2  | 6  | splicing factor,<br>arginine/serine-rich 6                                                                                                    |
| DV44 | CATGTGGAGATAGA  | 6  | 0  | 6.2  | 5  | RNA binding motif<br>protein 13                                                                                                               |
| DV45 | CATGGCCGGTACCGG | 6  | 0  | 6.2  | 2  | Str#S23705173                                                                                                                                 |
| DV46 | CATGGCACCCGATA  | 6  | 0  | 6.2  | 2  | Not assigned                                                                                                                                  |
| DV47 | CATGGAATACTATA  | 6  | 0  | 6.2  | 18 | <i>cone-rod homeobox (crx)</i>                                                                                                                |
| DV48 | CATGTCCTTCGTTA  | 2  | 11 | -5.4 | 2  | calcium activated<br>nucleotidase 1                                                                                                           |
| DV49 | CATGTACCTCCAAT  | 2  | 11 | -5.4 | 2  | <i>Xt6.1-XZG44017.5</i>                                                                                                                       |
| DV50 | CATGAAAAGGACTG  | 2  | 11 | -5.4 | 9  | transmembrane protein 32                                                                                                                      |
| DV51 | CATGTTCTAAATGT  | 0  | 6  | -5.8 | 44 | <i>Dnajc2-prov protein</i>                                                                                                                    |
| DV52 | CATGTTCGTGGAGG  | 0  | 6  | -5.8 | 1  | LOC496724                                                                                                                                     |
| DV53 | CATGTTACAACCTTG | 0  | 6  | -5.8 | 10 | Integral membrane<br>protein GPR137B<br>(Transmembrane 7<br>superfamily member 1<br>protein)                                                  |
| DV54 | CATGTGAGTTTGTG  | 0  | 6  | -5.8 | 13 | phosphatidylinositol<br>transfer protein, alpha<br>(pitpna),<br><i>Xt6.1-CABH10159.5SS</i>                                                    |
| DV55 | CATGTATGTACACC  | 0  | 6  | -5.8 | 16 | <i>Xt6.1-Ttba059c13.3</i>                                                                                                                     |
| DV56 | CATGTACTAAAAAT  | 0  | 6  | -5.8 | 46 | MGC69221                                                                                                                                      |
| DV57 | CATGGTGCCAGTGA  | 0  | 6  | -5.8 | 16 | <i>Bambi</i>                                                                                                                                  |
| DV58 | CATGGGTTAAGGTT  | 0  | 6  | -5.8 | 19 | <i>nucleobindin 1</i>                                                                                                                         |
| DV59 | CATGGCACTTGTTT  | 0  | 6  | -5.8 | 21 | <i>fatty acid binding protein<br/>3, muscle and heart</i>                                                                                     |
| DV60 | CATGGAAGAGGCAA  | 0  | 6  | -5.8 | 27 | Str#S23215713,<br>Str#S34494240,<br>Uncharacterized protein<br>KIAA0574 (Fragment)                                                            |
| DV61 | CATGCTCAACCTGG  | 0  | 6  | -5.8 | 5  | Not assigned                                                                                                                                  |
| DV62 | CATGCTAAGTTATT  | 0  | 6  | -5.8 | 7  | Str#S22514784,                                                                                                                                |
| DV63 | CATGATGTACAATT  | 0  | 6  | -5.8 | 15 | ENSXETT00000054938,<br>ADP-ribosylation factor 3                                                                                              |
| DV64 | CATGAAAATGCAGT  | 8  | 1  | 8.2  | 35 | <i>Xt6.1-Ttba02n08.3SS</i>                                                                                                                    |
| DV65 | CATGACAAACACAA  | 8  | 1  | 8.2  | 58 | Glutathione peroxidase 7<br>precursor (EC 1.11.1.9)<br>(CL683),<br><i>Brd7-prov protein</i>                                                   |
| DV66 | CATGTGAAATAAAT  | 10 | 2  | 5.1  | 93 | MGC75584,<br>calcitonin gene-related<br>peptide-receptor<br>component protein (rcp9),<br><i>Xt6.1-CAAN7840.3</i> ,<br><i>Xt6.1-CABA4576.5</i> |
| DV67 | CATGGCGGAAGTGA  | 10 | 2  | 5.1  | 7  | Ribonuclease P protein<br>subunit p38                                                                                                         |
| DV68 | CATGACAAGCTAAG  | 10 | 2  | 5.1  | 5  | Not assigned                                                                                                                                  |
| DV69 | CATGTACATAAGTT  | 1  | 8  | -7.8 | 17 | <i>Death-associated protein-<br/>like 1</i>                                                                                                   |

|       |                 |   |    |      |     |                                                                                         |
|-------|-----------------|---|----|------|-----|-----------------------------------------------------------------------------------------|
| DV70  | CATGTAAAGTTGAC  | 1 | 8  | -7.8 | 12  | <i>60S ribosomal protein L10a (CSA-19), Str#S20516889, Xt6.1-CAAP3220.3</i>             |
| DV71  | CATGGGGAAGTTTG  | 1 | 8  | -7.8 | 13  | Not assigned                                                                            |
| DV72  | CATGATGTAAATGC  | 1 | 8  | -7.8 | 22  | <i>zona pellucida glycoprotein 4</i>                                                    |
| DV73  | CATGAGTACAAAAT  | 1 | 8  | -7.8 | 24  | <i>Xt6.1-CABD13995.3, Xt6.1-TNeu063n12.3SS, Xt6.1-XZG53362.5</i>                        |
| DV74  | CATGTTTTTGT     | 2 | 10 | -4.9 | 260 | <i>MOBI, Mps One Binder kinase activator-like 1B, ENSXETT00000045544, Str#S16960692</i> |
| DV75  | CATGACATTTTAGG  | 2 | 10 | -4.9 | 17  | <i>lamin B1</i>                                                                         |
| DV76  | CATGTGTGCAGAGA  | 5 | 0  | 5.1  | 29  | <i>flap structure specific endonuclease 1</i>                                           |
| DV77  | CATGTGCCACAGTG  | 5 | 0  | 5.1  | 27  | <i>Str#S42160483</i>                                                                    |
| DV78  | CATGTCTCTATTAA  | 5 | 0  | 5.1  | 21  | Not assigned                                                                            |
| DV79  | CATGTCCCGTACAT  | 5 | 0  | 5.1  | 0   | No match to genome                                                                      |
| DV80  | CATGTCAGAGCATC  | 5 | 0  | 5.1  | 9   | <i>Xt6.1-TNeu051c17.5</i>                                                               |
| DV81  | CATGGTTTTGGCAC  | 5 | 0  | 5.1  | 10  | <i>Str#S43286247</i>                                                                    |
| DV82  | CATGGTTCACCTGT  | 5 | 0  | 5.1  | 8   | <i>LOC548815</i>                                                                        |
| DV83  | CATGGTGTCTGTGT  | 5 | 0  | 5.1  | 62  | <i>ADP-ribosylation factor related protein 1</i>                                        |
| DV84  | CATGGGAAGGCAAA  | 5 | 0  | 5.1  | 40  | <i>Lysophosphatidic acid receptor 2, Xt6.1-XZF1171.3S</i>                               |
| DV85  | CATGGCTGCCTTCT  | 5 | 0  | 5.1  | 18  | <i>orthodenticle homeobox 2</i>                                                         |
| DV86  | CATGGCAATGATCA  | 5 | 0  | 5.1  | 21  | Not assigned                                                                            |
| DV87  | CATGGATAAGCTAC  | 5 | 0  | 5.1  | 7   | Not assigned                                                                            |
| DV88  | CATGCTTTTATTTT  | 5 | 0  | 5.1  | 103 | <i>Str#S17733131, Xt6.1-XZT67122.5, Xt6.1-TTbA020f14.5SS</i>                            |
| DV89  | CATGCTGGTTGCAA  | 5 | 0  | 5.1  | 13  | <i>Str#S26249311</i>                                                                    |
| DV90  | CATGCTGAAATTAG  | 5 | 0  | 5.1  | 23  | <i>Regulator of G-protein signaling 7-binding protein (R7 family-binding protein)</i>   |
| DV91  | CATGCCTATCGGCA  | 5 | 0  | 5.1  | 1   | <i>Xt6.1-TEgg042i09.3</i>                                                               |
| DV92  | CATGCAGAGCAGAA  | 5 | 0  | 5.1  | 29  | <i>UTP15, U3 small nucleolar ribonucleoprotein, homolog (utp15)</i>                     |
| DV93  | CATGCAACACTGAA  | 5 | 0  | 5.1  | 19  | <i>Zic family member 3 heterotaxy 1</i>                                                 |
| DV94  | CATGATATCGTTTA  | 5 | 0  | 5.1  | 2   | Not assigned                                                                            |
| DV95  | CATGACTGAATAAA  | 5 | 0  | 5.1  | 39  | <i>Str#S16958610</i>                                                                    |
| DV96  | CATGAAAATGTTAA  | 5 | 0  | 5.1  | 59  | <i>Xt6.1-TGas120k14.3</i>                                                               |
| DV97  | CATGAAAATGCTAA  | 5 | 0  | 5.1  | 55  | <i>Interferon-related developmental regulator 2 (SKMC15 protein)</i>                    |
| DV98  | CATGTTTTACAATA  | 0 | 5  | -4.9 | 43  | <i>Xt6.1-CABJ1926.3</i>                                                                 |
| DV99  | CATGTTTATACAGTT | 0 | 5  | -4.9 | 37  | <i>ENSXETT00000023000 (without description)</i>                                         |
| DV100 | CATGTTAACCAACA  | 0 | 5  | -4.9 | 8   | Not assigned                                                                            |
| DV101 | CATGTTAACATTTG  | 0 | 5  | -4.9 | 34  | Not assigned                                                                            |
| DV102 | CATGTTAACCTGA   | 0 | 5  | -4.9 | 12  | Not assigned                                                                            |
| DV103 | CATGTGCCAAAAAT  | 0 | 5  | -4.9 | 49  | <i>Str#S21734651</i>                                                                    |

|       |                  |   |   |      |     |                                                                                                                                  |
|-------|------------------|---|---|------|-----|----------------------------------------------------------------------------------------------------------------------------------|
| DV104 | CATGCTTACTTAC    | 0 | 5 | -4.9 | 7   | <i>Str#S37580355</i>                                                                                                             |
| DV105 | CATGTCATTTTGC    | 0 | 5 | -4.9 | 57  | <i>Xt6.1-XZT41995.3</i>                                                                                                          |
| DV106 | CATGTAAC TACCCC  | 0 | 5 | -4.9 | 13  | <i>Nck-associated protein 1 (NAP 1) (p125Nap1) (Membrane-associated protein HEM-2)</i>                                           |
| DV107 | CATGGGTGCGATGA   | 0 | 5 | -4.9 | 2   | <i>PRP31 pre-mRNA processing factor 31 homolog (prpf31)</i>                                                                      |
| DV108 | CATGGATTTGCTCA   | 0 | 5 | -4.9 | 26  | <i>CDC20 cell division cycle 20 homolog</i>                                                                                      |
| DV109 | CATGCCCCCTAAGT   | 0 | 5 | -4.9 | 4   | Not assigned                                                                                                                     |
| DV110 | CATGCCCATATATA   | 0 | 5 | -4.9 | 41  | <i>MGC145307</i>                                                                                                                 |
| DV111 | CATGCAGAAGGAAT   | 0 | 5 | -4.9 | 26  | <i>Xt6.1-XZT56795.5</i>                                                                                                          |
| DV112 | CATGACTCTGTAGC   | 0 | 5 | -4.9 | 6   | <i>MAP3K12 binding inhibitory protein 1 (mbip)</i>                                                                               |
| DV113 | CATGAAGGAAATGC   | 0 | 5 | -4.9 | 14  | <i>LOC549814</i>                                                                                                                 |
| DV114 | CATGAAAAATGTTGGG | 0 | 5 | -4.9 | 22  | <i>protein phosphatase 1, regulatory subunit 15A, Phospholipid hydroperoxide glutathione peroxidase, mitochondrial precursor</i> |
| DV115 | CATGTTTGATTGGT   | 7 | 1 | 7.2  | 21  | <i>voltage-dependent anion channel 1 (vdac1)</i>                                                                                 |
| DV116 | CATGTGTAAAAAGA   | 7 | 1 | 7.2  | 39  | <i>MGC69468 protein, Xt6.1-CAA09219.3SSS</i>                                                                                     |
| DV117 | CATGGTACTGGAAA   | 7 | 1 | 7.2  | 14  | <i>MGC89748</i>                                                                                                                  |
| DV118 | CATGCTTCCCACCA   | 7 | 1 | 7.2  | 10  | <i>transmembrane and coiled-coil domain family 2 (tmcc2), Str#S17793010</i>                                                      |
| DV119 | CATGTTTCTTCCAG   | 1 | 7 | -6.8 | 17  | <i>Str#S22770715</i>                                                                                                             |
| DV120 | CATGTGTTTATATT   | 1 | 7 | -6.8 | 238 | <i>Str#S22514775, Xt6.1-CABI14076.3SS, Xt6.1-CABD514.3SS</i>                                                                     |
| DV121 | CATGTGTATTATC    | 1 | 7 | -6.8 | 26  | <i>Str#S30067137</i>                                                                                                             |
| DV122 | CATGCAGGAGTTTT   | 1 | 7 | -6.8 | 21  | <i>Hairy and enhancer of split 1, (Hairy2)</i>                                                                                   |
| DV123 | CATGATAAAAAAAAA  | 1 | 7 | -6.8 | 272 | <i>26 transcripts</i>                                                                                                            |
| DV124 | CATGACTGAGATAA   | 1 | 7 | -6.8 | 9   | <i>Str#S35898101</i>                                                                                                             |
| DV125 | CATGAAGGAGGGTG   | 1 | 7 | -6.8 | 11  | <i>MGC69188</i>                                                                                                                  |

**Supplementary Table 2. Tag-mapping of tags with significant differential expression between dorsal and ventral libraries.**

Tags with statistical significant difference of frequency of occurrence between SAGE libraries (3 tests,  $p < 0.05$ ) and a fold-ratio of 5 or higher are indicated (listed by p-value, not shown). Reliable tag-mappings (position 1, 2 or polyA-next) in the transcript databases are indicated with the description of each gene when it is present (Ensembl or NCBI). For tags without matches in Ensembl cDNAs or NCBI mRNA sequences, Unigenes and/or Gurdon EST clusters are indicated. When several matches are found, all of them are indicated, but if position 1 and position 2 are present, only transcripts with match in position 1 are indicated.

## Faunes et al, Supplementary Table 3

| DV_tag  | rSAGE sequence                                                                                                                                                                        | Genome position/transcript                                                                         |
|---------|---------------------------------------------------------------------------------------------------------------------------------------------------------------------------------------|----------------------------------------------------------------------------------------------------|
| DV01.1  | CATGAAACCTGTTTTTCCTTATGTCTGTGCTATTC<br>TTGATATTAATATATAAACTTGTTCAATTA<br>AAAAAAAAAAAAAAAAAAAAAAAA                                                                                     | scaffold_474:87,681-87,744<br><i>pintallavis</i>                                                   |
| DV01.2  | CATGAAACCTGTTTTTCCTTATGTCTGTGCTATTC<br>TTGATATTAATATATAAACTTGTTCAATTA<br>AAAAAAAAAAAAAAAAAAAAAAAA                                                                                     | scaffold_474:87,681-87,744<br><i>pintallavis</i>                                                   |
| DV01.3  | CATGAAACCTGTTTTTCCTTATGTCTGTGCTATTC<br>TTGATATTAATATATAAACTTGTTCAATTA<br>AAAAAAAAAAAAAAAAAAAAAAAA                                                                                     | scaffold_474:87,681-87,744<br><i>pintallavis</i>                                                   |
| DV04.1  | CATGCATTAATGAATGTAAAAAAAAAAAAAAAA<br>AAAAAAAAAAAAAAAA                                                                                                                                 | scaffold_19023: 2428-2444                                                                          |
| DV04.4  | CATGCATTAATGAATGAAAAAAAAAAGAAAA<br>AAAAAAAAAAAAAAAA                                                                                                                                   | scaffold_19023: 2428-2444                                                                          |
| DV04.11 | CATGCATTAATGAATGAAAAAAAAAAGAAAA<br>AGAAAAAAAA                                                                                                                                         | scaffold_19023: 2428-2444                                                                          |
| DV05.1  | CATGAGCTGTATGCCACAATCATCAATATTA<br>CAAGAAAAAAAA                                                                                                                                       | 178 genomic matches<br>Cluster Str.39849                                                           |
| DV05.2  | CATGAGCTGTATGCCACAATCATCAATATTA<br>CAAGAAAAGGCTTGAACACTAAAAAAAA<br>AAAAAAAAAAAAAAAA                                                                                                   | 190 genomic matches<br>Cluster Str.39849                                                           |
| DV05.3  | ATGAGCTGTATGCCACAATCATCAATATTA<br>AAGAAAAGGCTTGAACACTTCAAAAA<br>AAAAAAAAAAAAAAAA                                                                                                      | 199 genomic matches<br>Cluster Str.39849                                                           |
| DV05.4  | CATGAGCTGTATGCCACAATCATCAATATTA<br>CAAGAAAAAAAAAAAAAAAAAAAAAAAA                                                                                                                       | 179 genomic matches<br>Cluster Str.39849                                                           |
| DV06.3  | CATGATGTGGGATCTGTACATAAAGTGAAAT<br>TATCATTTTCATTGCCTGTAAATAAAAA<br>GCAGGCATTTGCACAGATACACTGTACTG<br>TACTATTTATACCTTAAGTTAAAGGAATT<br>AATAAACAGATGGCAAAAAAAAAAAAA<br>AAAAGAAAAAAAA     | scaffold_185:1,843,070-1,843,218<br><i>gooseoid</i>                                                |
| DV07.3  | CATGTGGCGTTCCGTAAAAAAAAAAAAAAAAA                                                                                                                                                      | scaffold_321:185,446-185,460<br>(SNP G→A, BASE 14)<br><i>zsl-2</i>                                 |
| DV08.3  | CATGGAAATAAACAAAAAAAAAAAAAAAA                                                                                                                                                         | scaffold_1309:71,568-71,581<br><i>ubadcl</i>                                                       |
| DV08.7  | CATGGAAATAAACAAAAAAAAAAAAAAAA<br>AAAA                                                                                                                                                 | scaffold_328: 504,732- 504,745<br><i>LOC496648</i><br>scaffold_1309:71,568-71,581<br><i>ubadcl</i> |
| DV08.8  | CATGGAAATAAACCTCTTTATGCAAAAA<br>AAAAAAAAAAAAAAAA                                                                                                                                      | scaffold_328: 504,732- 504,745<br><i>LOC496648</i><br>scaffold_1309:71,558-71,581<br><i>ubadcl</i> |
| DV09.1  | CATGCAAGTATGTTGGTAACGTTATGTCCTG<br>AAAGGATTAATAATTAAGAAAAAAAA<br>AAAAAAAAAAAAAAAA                                                                                                     | scaffold_125:1,689,068-1,689,121<br><i>sox11</i>                                                   |
| DV09.2  | CATGCAAGTATGTTGGTAACGTTATGTCCTG<br>AAAGGATTAATAATTAAGAAAAAAAAAG<br>AAAAAAAAAAAAAAAA                                                                                                   | scaffold_125:1,689,068-1,689,121<br><i>sox11</i>                                                   |
| DV10.13 | CATGTACTGCGTTACTCTTTGTAATATTTG<br>TATAAGCAAATTGTTAATATATAATGCTT<br>GTAATCTGTAACTTAACGTGTGAGGATA<br>TCTTTTTATAAATGTACATATTAATATAT<br>TTAAAAATAAATTTCTATGCAAGAACCTT<br>AAAAAAAAAAAAAAAA | scaffold_112:387,252-387,420<br><i>admp</i>                                                        |
| DV12.5  | CATGCTCTTACCCTAAGGAAGGGCTGACTC<br>AGCCCTTCCCTTCAGAGGTTTAATATGCT<br>GATGCAGTTATAAATAAGAGGTATTTGT<br>CTGCCAAAAAAAAACTTTCTGTAATAAAAG<br>ATTTGAAATGTAAAAAAAAAAAAAAAA<br>AAAAAAA           | scaffold_411:704,144-704,291<br><i>LOC549498</i>                                                   |

|        |                                                                                                                                                                                                                                         |                                                      |
|--------|-----------------------------------------------------------------------------------------------------------------------------------------------------------------------------------------------------------------------------------------|------------------------------------------------------|
| DV12.6 | CATGCTCTTACCCTAAGGAAGGGGCTGACTTCTC<br>AGTCCTTCCCTTCAGAGGTTTTAACATGTCTTTCA<br>GATGCAATTATAAATAAAGAGGTATTTTGTGTAA<br>CTGCCAAAAAAAAAACTTTCTGTAATAAAAGCTTA<br>ATTTGAAAGTGCAAAAAAAAAAAAAAAAAAAAAAA<br>AAAAA                                  | scaffold_411:704,144-704,291<br><i>LOC549498</i>     |
| DV12.8 | CATGCTCTTACCCTAAGGAAGGGGCTGACTTCTC<br>AGTCCTTCCCTTCAGAGGTTTTAATATGTCTTTCA<br>GATGCAGTTATAAATAAAGAGGTATTTTGTGTAA<br>CTGCCAAAAAAAAAACTTTCTGTAATAAAAGCTTA<br>ATTTGAAATGTAAAAAAAAAAAAAAAAAAAAAA<br>AAAAA                                    | scaffold_411:704,144-704,291<br><i>LOC549498</i>     |
| DV12.9 | CATGCTCTTACCCTAAGGAAGGGGCTGACTTCTC<br>AGTCCTTCCCTTCAGAGGTTTTAATATGTCTTTCA<br>GATGCAGTTATAAATAAAGAGGTATTTTGTGTAA<br>CTGCCAAAAAAAAAACTTTCTGTAATAAAAGCTTA<br>ATTTGAAAGGTAAAAAAAAAAAAAAAAAAAAAA<br>AAAAA                                    | scaffold_411:704,144-704,291<br><i>LOC549498</i>     |
| DV13.2 | CATGCTAGACTTTTTATAAAAAGTTTGGTTGTAAA<br>GCCTTTTTTTATACAGAATAAATCGATCGTGTTTA<br>TGGAAAAAAAAAAAAAAAAAAAAAAAAAAAAAA                                                                                                                         | scaffold_125:418,146-418,217<br><i>id-2</i>          |
| DV13.3 | CATGCTAGACTTTTTATAAAAAGTTTGGTTGTAAA<br>GCCTTTTTTTATACAGAATAAATCGATCGTGTTTA<br>TGGAAAAAAAAAAAAAAAAAAAAAAAAAAAAAA                                                                                                                         | scaffold_125:418,146-418,217<br><i>id-2</i>          |
| DV13.4 | CATGCTAGACTTTTTATAAAAAGTTTGGTTGTAAA<br>GCNCTTTTTTTATACAGAATAAATCGATCGTGTT<br>ATGAAAAAAAAAAAAAAAAAAAAAAAAAAAAAA                                                                                                                          | scaffold_125:418,146-418,217<br><i>id-2</i>          |
| DV14.3 | CATGTGGGAACAGATGTATATGATGATTCATTAT<br>CTTGACATTCTTGAAATCAGATATTTTGTCAATC<br>TCCTTCAGTAAGCGATGCCAATGAAAAAGGGAA<br>GCATTATGTTTACAGATGTGATTATTGGAATGTTT<br>GCCAAAATATTTGGTATCTCTAATAAACTTTGCC<br>TCCAGCGTTGAAAAAAAAAAAAAAAAAAAAAA<br>AAAAA | scaffold_58:1,610,508-1,610,688<br>Cluster Str.65896 |
| DV16.2 | CATGCGCTGTTACAAAAACCCTACTTGTACAGG<br>AGCTGTTTGTTC AACAGAAACAGATCAATAAAT<br>GACATCAATATTTAAAAATAAAAGAAAAAAAAAA<br>AAAAAAAAAAAAAAAAAAAAAAAAAAAAAA                                                                                         | scaffold_353:66,955-67,035<br><i>MGC147163</i>       |
| DV16.5 | CATGCGCTGTTACAAAAACCCTACTTGTACAGG<br>AGCTGTTTGTTC AACAGAAACAGATCAATAAAT<br>GACATCAATATTTAAAAAGAAAAAAAAAAAAAA<br>AAAAA                                                                                                                   | scaffold_353:66,955-67,035<br><i>MGC147163</i>       |
| DV17.1 | CATGATTGGTGCCCTTTAAGGAGCAAAAAAAAAA<br>ACAAAA                                                                                                                                                                                            | scaffold_27:677,348-677,371<br>Cluster Str.40022     |
| DV17.5 | CATGATTGGTGCCCTTTAAGGAGCAAAAAAAAAA<br>ACAAAATAAAAAAAAAAAAA                                                                                                                                                                              | scaffold_27:677,348-677,371<br>Cluster Str.40022     |
| DV18.1 | CATGAAAATTAATGCCCGTTTCCGAAAAAAAAA<br>AAAAAAAAAAAAAAAAAAAAAA                                                                                                                                                                             | scaffold_69:2,316,073-2,316,097<br><i>LOC548724</i>  |
| DV18.3 | CATGAAAATTAATGCCCGTTTCCGAAAAAAAAA<br>AAAAAAAAAAAAAAAAAAAAAA                                                                                                                                                                             | scaffold_69:2,316,073-2,316,097<br><i>LOC548724</i>  |

**Supplementary Table 3. Reverse SAGE sequences and transcript assignment.**

For each tag, the specific rSAGE sequences of different clones and their genome and transcript matches are indicated.

## Faunes et al, Supplementary Table 4

| Transcript                    | Forward                    | Reverse                    | Annealing temperature |
|-------------------------------|----------------------------|----------------------------|-----------------------|
| <i>Xenopus tropicalis</i>     |                            |                            |                       |
| <i>ef1<math>\alpha</math></i> | ACTCAATCACCCAGGACAGATTAGTG | GTGGGTAGTCTGAGAAGGTTTCTACA | 55                    |
| <i>odc1</i>                   | GCACATGTCAAGCCAGTTCT       | TGCGCTCAGTTCTGGTACTT       | 60                    |
| <i>chordin</i>                | ACCCAGAGAGCCAGAGACAA       | ATCCACAGGGTCCACAGAAG       | 55                    |
| <i>sizzled</i>                | CAGAAGGCCAGTTGAGTTC        | TGATGGATGTCACCAGCAAT       | 55                    |
| <i>DV01</i>                   | CTGGGAGCAGATTTTGCTGT       | TCAAGAATAGCACAGACATAAGGAA  | 59                    |
| <i>DV04</i>                   | CCCGGGTGGAAAATAGGTAA       | GCCTCAATCGAATTGGGTAA       | 55                    |
| <i>DV04 probe</i>             | TTGTGCTTTCGGAGCTTTTT       | GCCTCAATCGAATTGGGTAA       | 55                    |
| <i>DV05</i>                   | TGGTGTGGTCCACTGTGTT        | TATGGGGTTCAGGTCAGGAG       | 55                    |
| <i>DV05 probe</i>             | TTGTGGAGAAGGACCGATTTC      | ACTTGGTCGGGAATCCTTTT       | 55                    |
| <i>DV07</i>                   | TGCTTCTGATTTGCTTGCAG       | CTTTGAAGAAGTCCCTTG         | 59                    |
| <i>DV07 probe</i>             | ACTTGCCCTGACGTATGTT        | CATCCCTTGCCTAGAAAACAA      | 55                    |
| <i>DV08</i>                   | AGTGGCTATTGGGTGACAGG       | GTGCGGTTTAAGGTTTGAA        | 60                    |
| <i>DV08 probe</i>             | GACGAGGATCGGGTAGATGA       | GGGATTTGGTATCCGACCT        | 55                    |
| <i>DV09</i>                   | GGAAACATTCCTGCTGTCGTT      | CCACAAGGCCTTTTAGATGC       | 55                    |
| <i>DV09 probe</i>             | ACCATCAAGTCCGAGTACGG       | CCCTCATCCATTTCTCTGGA       | 55                    |
| <i>DV11</i>                   | GGAGAGTGAAGGAGCACAAGG      | TTTGACATTTCTGCAACA         | 55                    |
| <i>DV12</i>                   | GTGTCTCCGGTGGCATAACT       | GAGAAGTCAGCCCCTCCTT        | 57                    |
| <i>DV12 probe</i>             | ACCTGCCCTGTGTGTAGGAC       | ACTGAGGGGTTCCATGTTTG       | 57                    |
| <i>DV13</i>                   | TTAAACCCGAAACGTGCAAC       | AAAAAGGCTTTACAACCAACTT     | 56                    |
| <i>DV13 probe</i>             | CTCCAGCACGTCATCGACTA       | GTGCAATGCGGATGGTAAGT       | 56                    |
| <i>DV14</i>                   | CATGTGGGAACAGATGTATA       | CAATGCTGGAGGCAAAGTTT       | 55                    |
| <i>DV14 probe</i>             | TTAACGCTGGAGGCAAAGTT       | AGGCCTAATGCTCAGGTCA        | 55                    |
| <i>DV16</i>                   | CACAGGCTGCATGTTTCATCT      | TCTGTTGAAACAAACAGTCCT      | 59                    |
| <i>DV16 probe</i>             | TTGTAATCGGAGGAGGATCG       | GTCTCCTTCTGTGCCTTTG        | 55                    |
| <i>DV17</i>                   | CTTCTCTCGTCACCCCTCTG       | ATTTTCTCTGGGCTGTGGTG       | 55                    |
| <i>DV18</i>                   | TTTGAGTGGCGGCCGAGTGC       | CGGGCATTTAATTTTCATGTG      | 56                    |
| <i>DV18 probe</i>             | ATGGACGGGTTGTAGCAAAG       | GGATTCATTGTGTGGCACTG       | 55                    |
| <i>DV22</i>                   | GGAGGACTCTTTGCTGTGG        | TCTTTCACCCATCTCCTTGC       | 60                    |
| <i>DV22 probe</i>             | CCAGAGGAGGCAATAACCAA       | ATAAAAGTGCTGGGCAAGGA       | 55                    |
| <i>DV25 probe</i>             | ACAGACCCTAAAAGCGAGCA       | ACTCTGCCACTTCAGGAGGA       | 55                    |
| <i>DV38</i>                   | GCATGTTCTTCACTTGCTTCAT     | GCACAGCTATTGCAAGCAGA       | 59                    |
| <i>DV38 probe</i>             | AATTGGGCACTTCTACGTG        | TTCAATGGGTGTGGTCTGAA       | 55                    |
| <i>Xenopus laevis</i>         |                            |                            |                       |
| <i>ef1<math>\alpha</math></i> | CCTGAACCACCCAGGCCAGATTGGTG | GAGGGTAGTCAGAGAAGCTCTCCAG  | 55                    |
| <i>chordin</i>                | CCTCCAATCCAAGACTCCAGCAG    | GGAGGAGGAGGAGCTTTGGGACAAG  | 55                    |
| <i>DV07</i>                   | TGTCATGCGACAGGTAGAGC       | GGCTCTGCAACAACCTCTCC       | 55                    |
| <i>DV07 probe</i>             | NIBB clon XI304d08ex       |                            |                       |
| <i>DV08</i>                   | TGCTATGCTGGATGAAGACG       | TTCATCTTTGGGGTCTCTG        | 55                    |
| <i>DV08 probe</i>             | NIBB clon XI073g09         |                            |                       |
| <i>DV09</i>                   | GCGCCAGTATGTACGAGGAT       | TAATCGGGGAAGTCAAGTG        | 55                    |
| <i>DV09 probe</i>             | CGAGAAAATCCCCTTCATCA       | TAATCGGGGAAGTCAAGTG        | 55                    |
| <i>DV12</i>                   | CTGGTATTCACTGCCCTGT        | ATAGTGGCAGCCAAAAATGG       | 55                    |
| <i>DV12 probe</i>             | NIBB clon XI519d09ex       |                            |                       |
| <i>DV13</i>                   | AAACCGCATTGACTTTTTG        | TAGCACCATCTCTGCCACTG       | 55                    |
| <i>DV13 probe</i>             | TACAGGCGGCTGAATTCTCT       | TAGCACCATCTCTGCCACTG       | 56                    |
| <i>DV14</i>                   | CTTGCATGCCAGAGTTGAAA       | CCGAGCTTTAGTGCCAAGAC       | 55                    |
| <i>DV14 probe</i>             | NIBB clon XI170k05         |                            |                       |
| <i>DV16</i>                   | TTGGGTGATTGGTAACAGCA       | CTCTGAGATGTTCCGGCACAA      | 56                    |
| <i>DV16 probe</i>             | NIBB clon XI516o04ex       |                            |                       |
| <i>DV18</i>                   | ACGGCAGGAAGAGAACTCA        | GAGCAAGTCCCAGCAACTTC       | 56                    |
| <i>DV18 probe</i>             | NIBB clon XI261d18ex       |                            |                       |
| <i>DV22</i>                   | AAGACCTTGCAATGGAGGA        | CAGAGAGACCACCAGCATGA       | 55                    |
| <i>DV22 probe</i>             | TTGCTGCCGATTCCCTAACC       | AAAGCAAAGCCCTCTTGACA       | 55                    |
| <i>DV25 probe</i>             | GCCAACAACAGCCAACTTT        | AAGGATCGGCATCAATCAAG       | 55                    |
| <i>DV38</i>                   | AGCCATCCTCACTGCAGACT       | ATCCTCAAGGCCACGTACAC       | 55                    |
| <i>DV38 probe</i>             | AAAGGAGGATCCCAAAGGAA       | ATCCTCAAGGCCACGTACAC       | 55                    |

**Supplementary Table 4. Primers and NIBB clones used in this study.**

Primers used are written from 5' end to 3' end (left to right). For *X. laevis*, clones from NIBB used for generating probes are indicated.
