# Supplementary material for: Identification of novel transcripts with differential dorso-ventral expression in Xenopus gastrula using serial analysis of gene expression
Source: PubMed Central journal article supplement (PMC2688288; doi:10.1186/gb-2009-10-2-r15), 2009-02-11
Supplement: gb-2009-10-2-r15-S3.pdf [file gb-2009-10-2-r15-S3.pdf]

## Faunes et al, Supplementary Figure S1

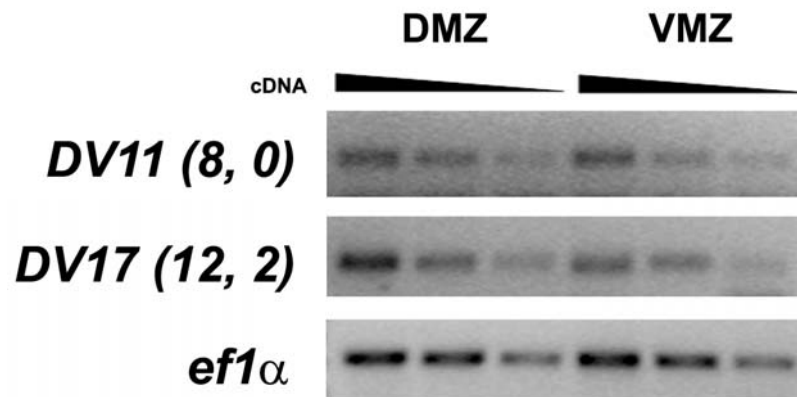

**Supplementary Figure S1.** Total RNA was obtained from dorsal (DMZ) and ventral (VMZ) explants isolated from *X. tropicalis* gastrula stage. Semi-quantitative RT-PCR was performed using specific primers for each transcript. The correct separation of explants was checked using primers for *chordin* and *sizzled* (Figure 3 and data not shown).
